# Supplementary material for: Hydrogen Peroxide Activation with Sulfidated Zero-Valent Iron for Synchronous Removal of Cr(VI) and BPA
Source: MDPI journal article supplement (doi:10.3390/catal12030252), 2022-02-23
Supplement: s1 [file s1]

## Supporting Information

### Hydrogen peroxide activation with sulfidated zero valent iron for simultaneous removal of Cr(VI) and BPA

Haibo Ling <sup>a,b</sup>, Xiaowei Zhu <sup>1, a</sup>, Ting Zhou <sup>a</sup>, Fan Su <sup>a</sup>, Jiangkun Du <sup>\*,a</sup>, Jianguo

Bao <sup>\*,a</sup>

a. School of Environmental Studies, China University of Geosciences,  
Wuhan 430074, P. R. China

b. Hubei Academy of Environmental Sciences, Wuhan 430072, PR  
China

---

1. Haibo Ling and Xiaowei Zhu contributed equally to this paper.

\* E-mail: dujk@cug.edu.cn; bjianguo@cug.edu.cn

SI contains 10 Figures and 1 Table

**Figure S1**

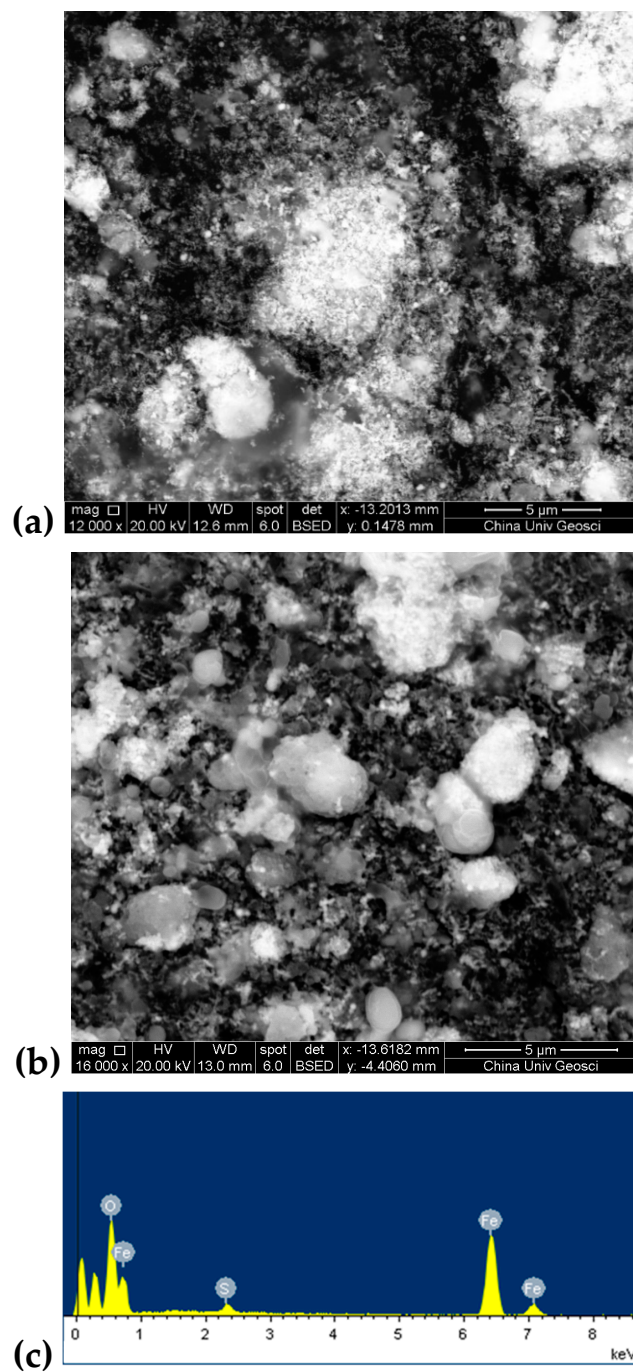

**Figure S1.** Scanning electron micrograph of S-nZVI particles, (a) and (b) Scanning electron microscopy image of S-nZVI, (c) Spectral recording of a spot on S-nZVI image.

**Figure S2**

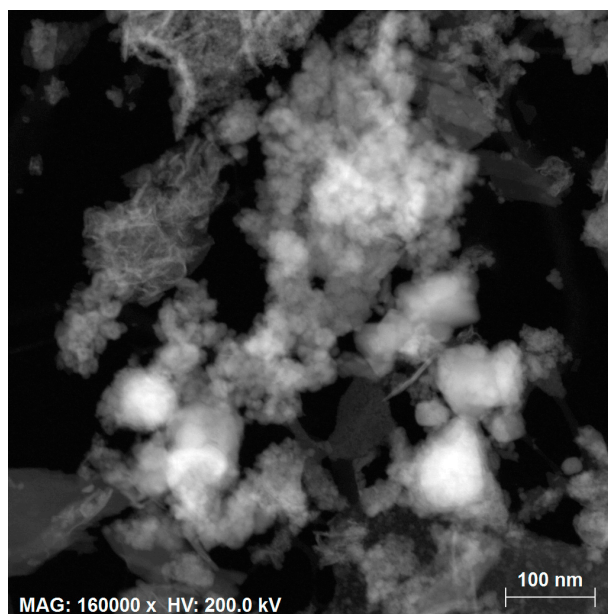

**Figure S2.** TEM image of S-nZVI.

**Figure S3**

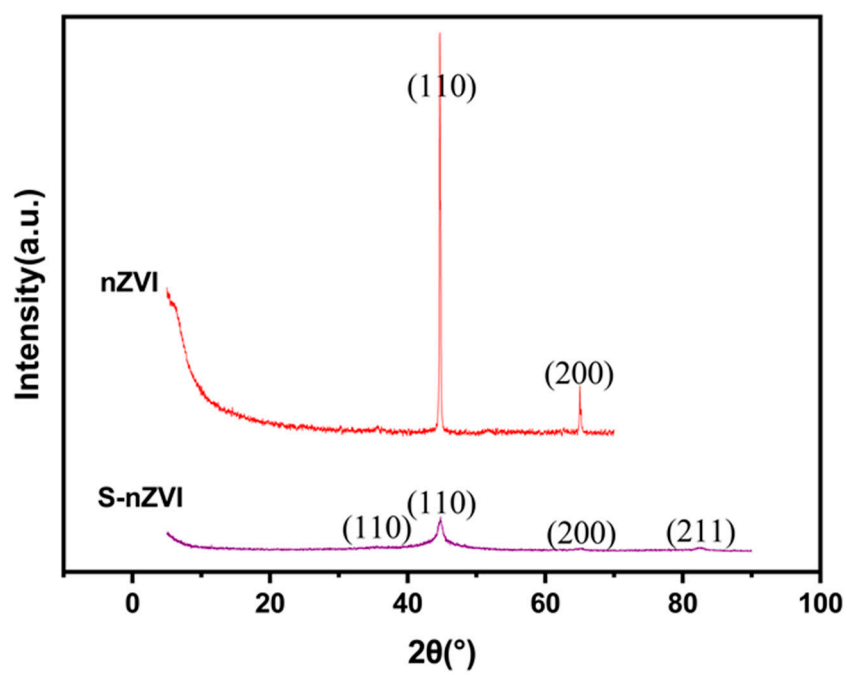

**Figure S3.** XRD patterns of nZVI and S-nZVI.

**Figure S4**

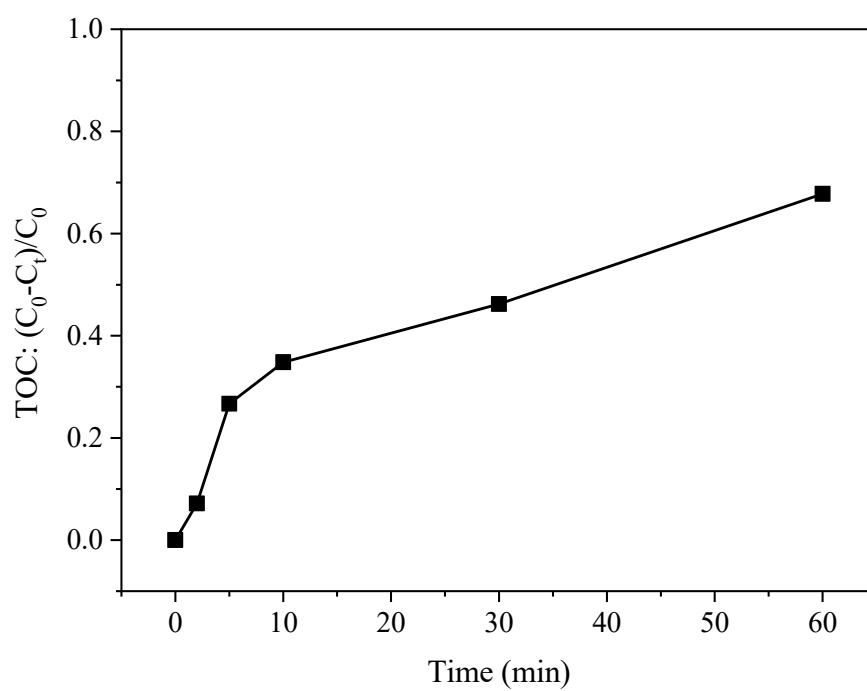

**Figure S4.** TOC removal efficiency in the S-nZVI/H<sub>2</sub>O<sub>2</sub>/Cr/BPA reaction system.

**Figure S5**

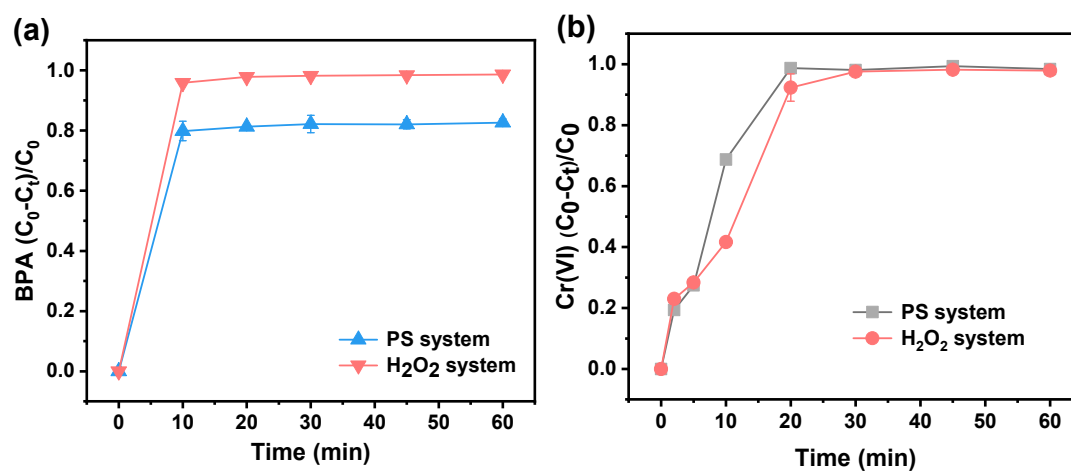

**Figure S5.** Synchronous removal of (a) BPA and (b) Cr(VI) in systems of S-nZVI/H<sub>2</sub>O<sub>2</sub> and S-nZVI/PS.

**Figure S6**

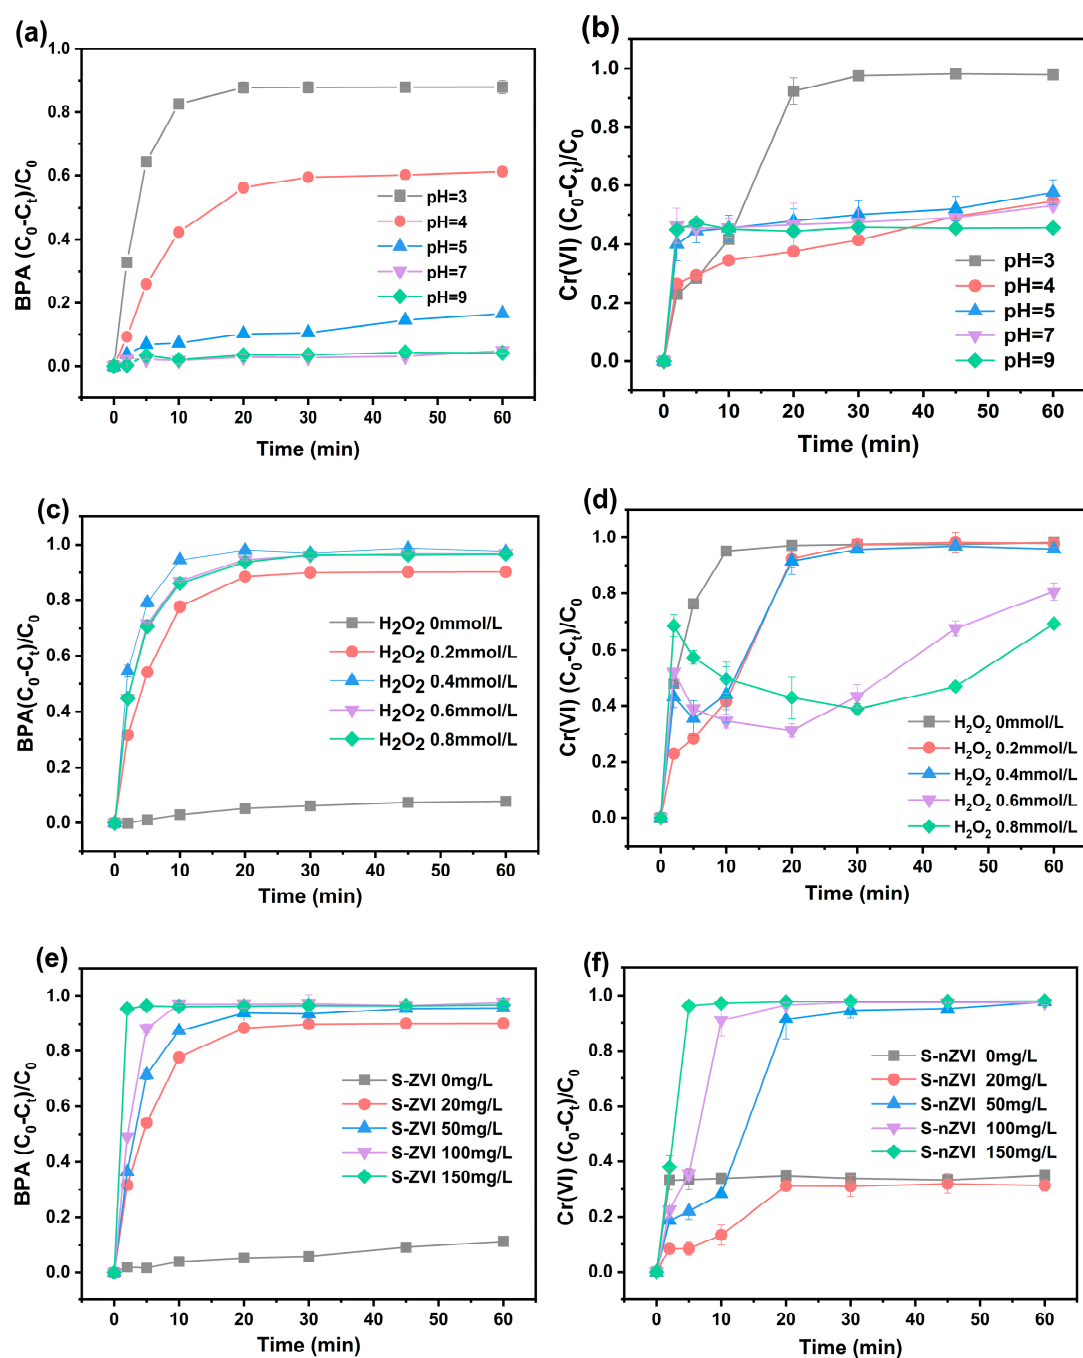

**Figure S6.** Effect of different conditions on simultaneous removal of BPA and Cr(VI) by S-nZVI; (a) and (b) solution pH; (c) and (d) oxidant dosage; (e) and (f) catalyst dosage.

Figure S7

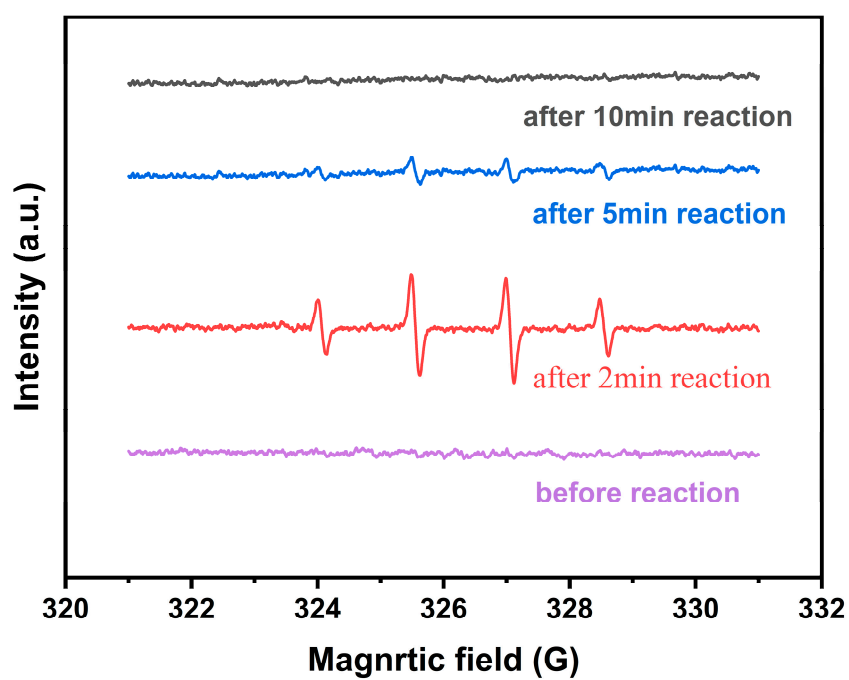

Figure S7. EPR characterization using DMPO



**Figure S8**

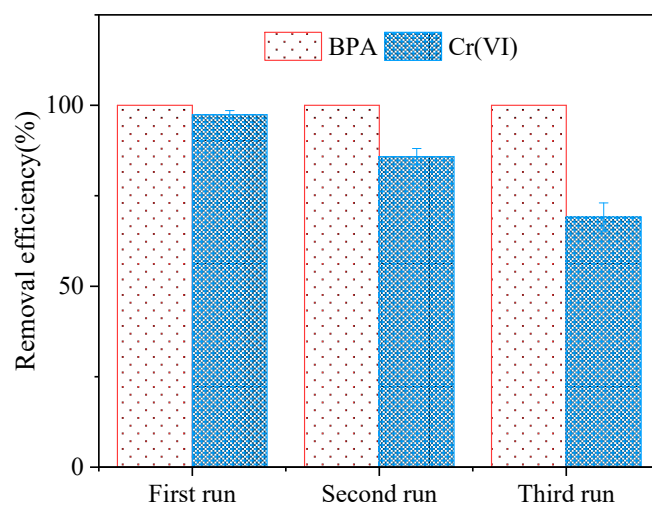

**Figure S8.** Reusability of S-nZVI for synchronous removal of Cr(VI) and BPA in the S-nZVI/H<sub>2</sub>O<sub>2</sub>/Cr/BPA reaction system.

**Figure S9**

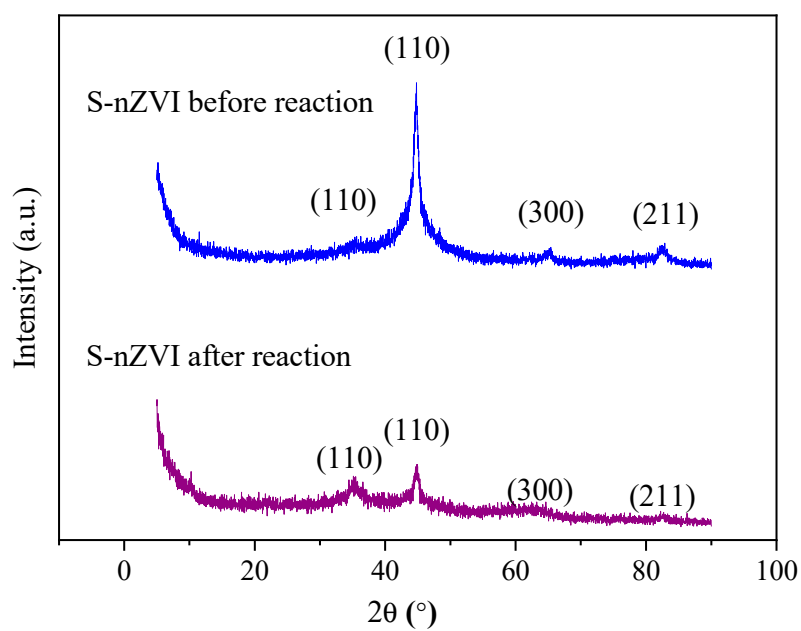

**Figure S9.** XRD patterns of S-nZVI before and after the reaction in the S-nZVI/H<sub>2</sub>O<sub>2</sub>/Cr/BPA system.

**Figure S10**

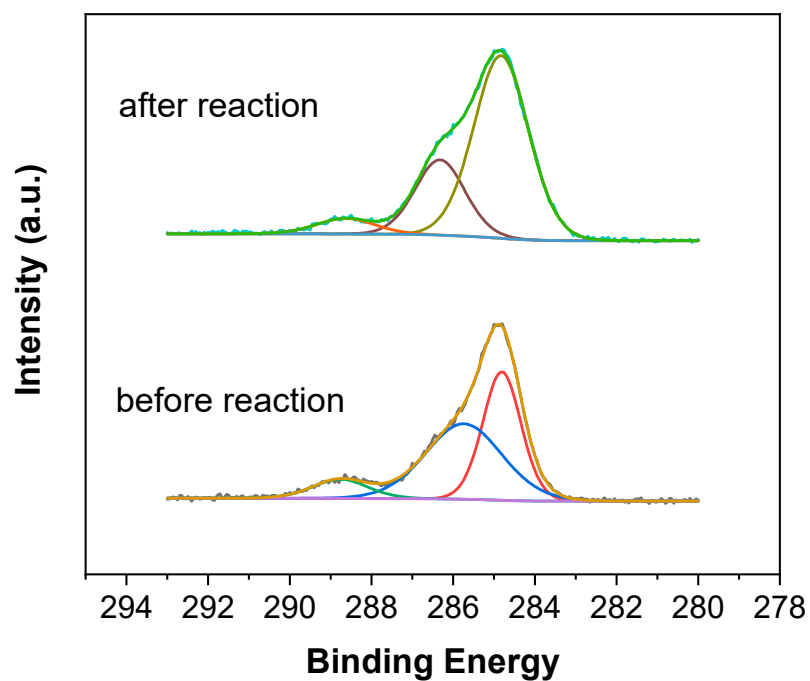

**Figure S10.** XPS spectra of C 1s of S-nZVI before and after the reaction.

**Table S1**

**Table S1.** The atomic fraction of each element of S-nZVI before and after the reaction

| Element                        | Atomic area (%) |             |
|--------------------------------|-----------------|-------------|
|                                | fresh S-nZVI    | used S-nZVI |
| Fe(II)                         | 29.86           | 30.48       |
| Fe(III)                        | 23.74           | 27.32       |
| Fe(0)                          | 2.55            | 0           |
| SO <sub>4</sub> <sup>2-</sup>  | 42.41           | 78.97       |
| SO <sub>3</sub> <sup>2-</sup>  | 1.35            | 6.38        |
| S <sup>2-</sup>                | 56.45           | 14.65       |
| Cr <sub>2</sub> O <sub>3</sub> | 0               | 23.29       |
| Cr(OH) <sub>3</sub>            | 0               | 76.71       |
| O-H group                      | 68.02           | 84.35       |
| metal oxides                   | 31.98           | 15.65       |
| C-C                            | 41.83           | 68.19       |
| C-O                            | 49.16           | 25.61       |
| C=O                            | 9.01            | 6.20        |
