# Supplementary material for: Hydrogen Peroxide Activation with Sulfidated Zero-Valent Iron for Synchronous Removal of Cr(VI) and BPA
Source: MDPI journal article supplement (doi:10.3390/catal12030252), 2022-02-23
Supplement: s1 [file s1]

Archive with 1 entries (1 files):
- catalysts-1597624-supplementary.pdf
